# Supplementary material
Source: PubMed Central journal article supplement (PMC3292176)

UM-SCC-34

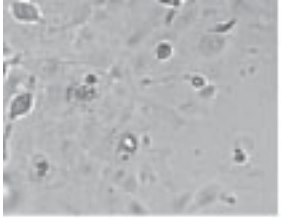

UM-SCC-35

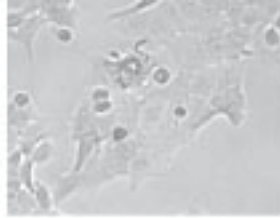

UM-SCC-36

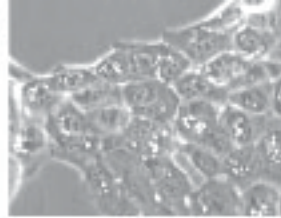

UM-SCC-37

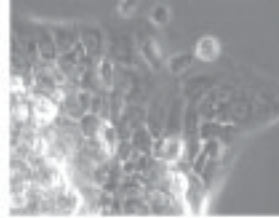

UM-SCC-38

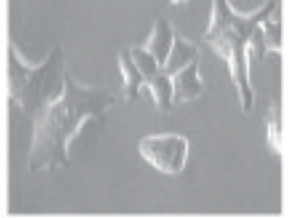

UM-SCC-39

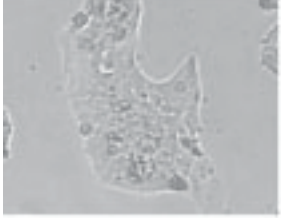

UM-SCC-40

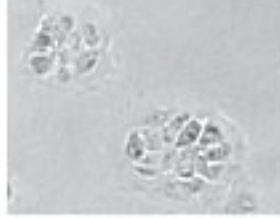

UM-SCC-41

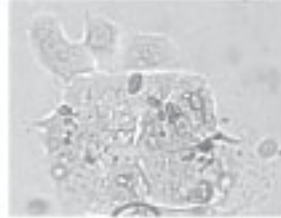

UM-SCC-42

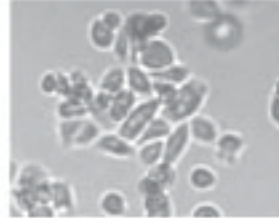

UM-SCC-43

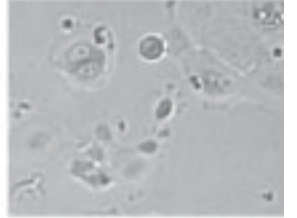

UM-SCC-44

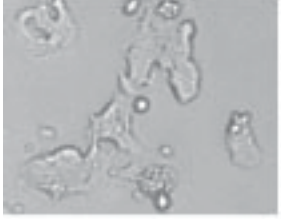

UM-SCC-45

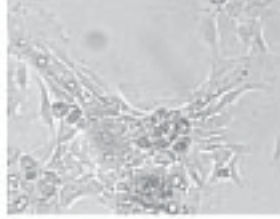

UM-SCC-46

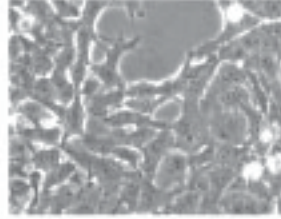

UM-SCC-47

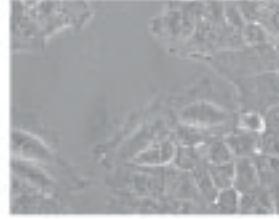

UM-SCC-48

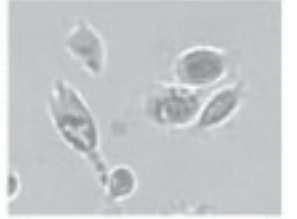

UM-SCC-49

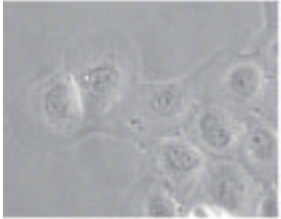

UM-SCC-50

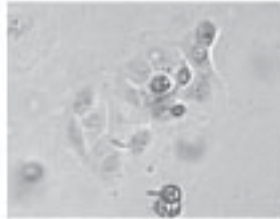

UM-SCC-51

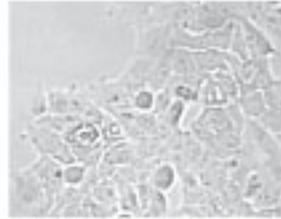

UM-SCC-52

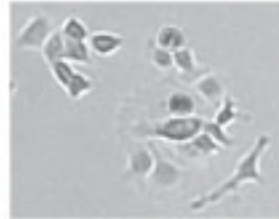

UM-SCC-53

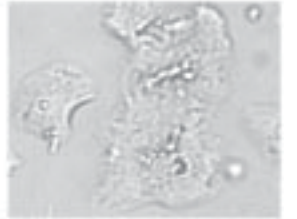

UM-SCC-54

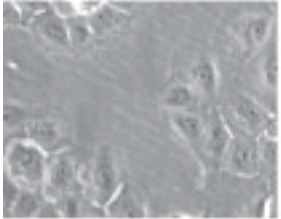

UM-SCC-55

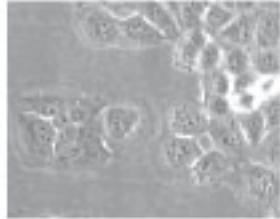

UM-SCC-56

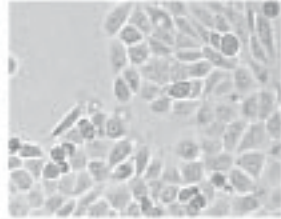

UM-SCC-57

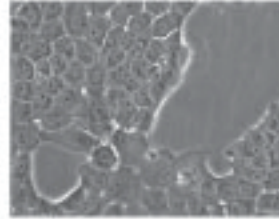

UM-SCC-58

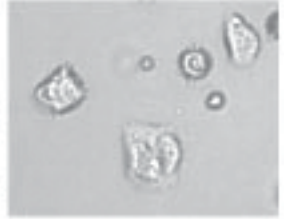

UM-SCC-59

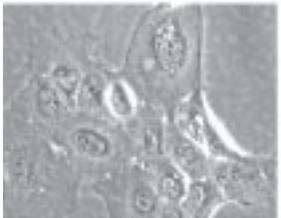

UM-SCC-60

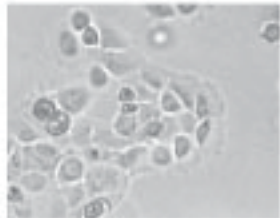

UM-SCC-69

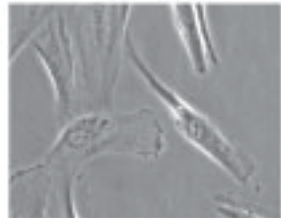

UM-SCC-70

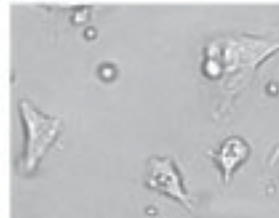

UM-SCC-73B

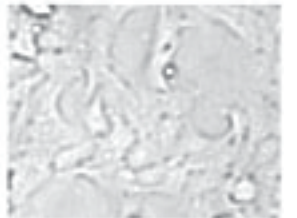

UM-SCC-74A

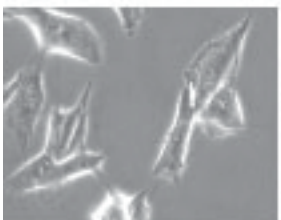

UM-SCC-74B

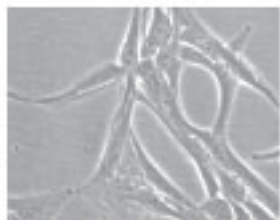

UM-SCC-80

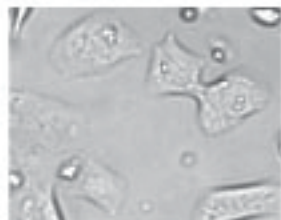

UM-SCC-81A

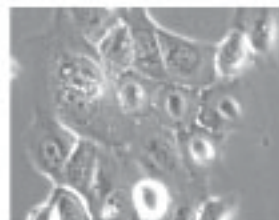

UM-SCC-81B

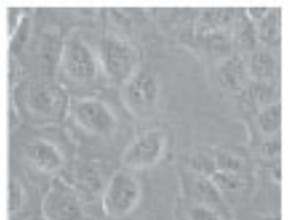

Supplement: NIHMS346104-supplement-s2.pdf [file NIHMS346104-supplement-s2.pdf]
