# Supplementary material
Source: PubMed Central journal article supplement (PMC3292176)

UM-SCC-82A

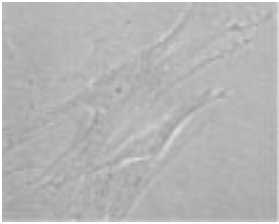

UM-SCC-92

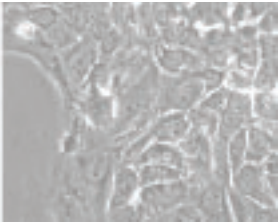

Supplement: NIHMS346104-supplement-s3.pdf [file NIHMS346104-supplement-s3.pdf]
